# Supplementary material for: Persistent Hypogammaglobulinemia after Receiving Rituximab Post-HSCT Is Not Caused by an Intrinsic B Cell Defect
Source: MDPI journal article supplement (doi:10.3390/ijms242116012), 2023-11-06
Supplement: s1 [file s1]

**Table S1.** Flow Cytometry antibodies used.

| CD CODE | TARGET     | CLONE ID  | LABEL       | SUPPLIER        |
|---------|------------|-----------|-------------|-----------------|
| CD3     |            | UCHT1     | AF594       | Biolegend       |
| CD4     |            | SK3       | PE-Fire640  | Biolegend       |
| CD8     |            | RPA-T8    | BUV395      | BD Biosciences  |
| CD16    |            | 3G8       | AF647       | Biolegend       |
| CD19    |            | SJ25C1    | BV786       | BD Biosciences  |
| CD24    |            | ML5       | BV650       | BD Biosciences  |
| CD25    |            | 2A3       | BUV615      | BD Biosciences  |
| CD27    |            | QA17A18   | APC-Fire810 | Biolegend       |
| CD38    |            | HIT2      | BV605       | Biolegend       |
| CD45    |            | HI30      | BUV805      | BD Biosciences  |
| CD45RA  |            | HI100     | BV570       | Biolegend       |
| CD56    |            | NCAM16.2  | BUV737      | BD Biosciences  |
| CD127   | IL-7Ralpha | eBioRDR5  | PE-Cy5.5    | eBioscience     |
| CD185   | CXCR5      | REA103    | PE-Vio770   | Miltenyi biotec |
| CD197   | CCR7       | G043H7    | APC-Fire750 | Biolegend       |
|         | IgA        | IS11-8E10 | FITC        | Miltenyi biotec |
|         | IgA        | IS11-8E10 | PE          | Miltenyi biotec |
|         | IgD        | IA6-2     | PerCP-Cy5.5 | Biolegend       |
|         | IgG        | G18-145   | PE          | BD Biosciences  |
|         | IgM        | G20-127   | BV480       | BD Biosciences  |
|         | TCRgd      | 11F2      | BV510       | BD Biosciences  |
